# Supplementary material for: Synthesis and Antibacterial Evaluation of Some Novel Imidazole and Benzimidazole Sulfonamides
Source: PubMed Central journal article supplement (PMC6270528; doi:10.3390/molecules181011978), 2013-09-26

## Supporting Materials

**Figure S1-<sup>1</sup>H & <sup>13</sup>C-NMR of compound-3a (400 MHz, DMSO-*d*<sub>6</sub>)**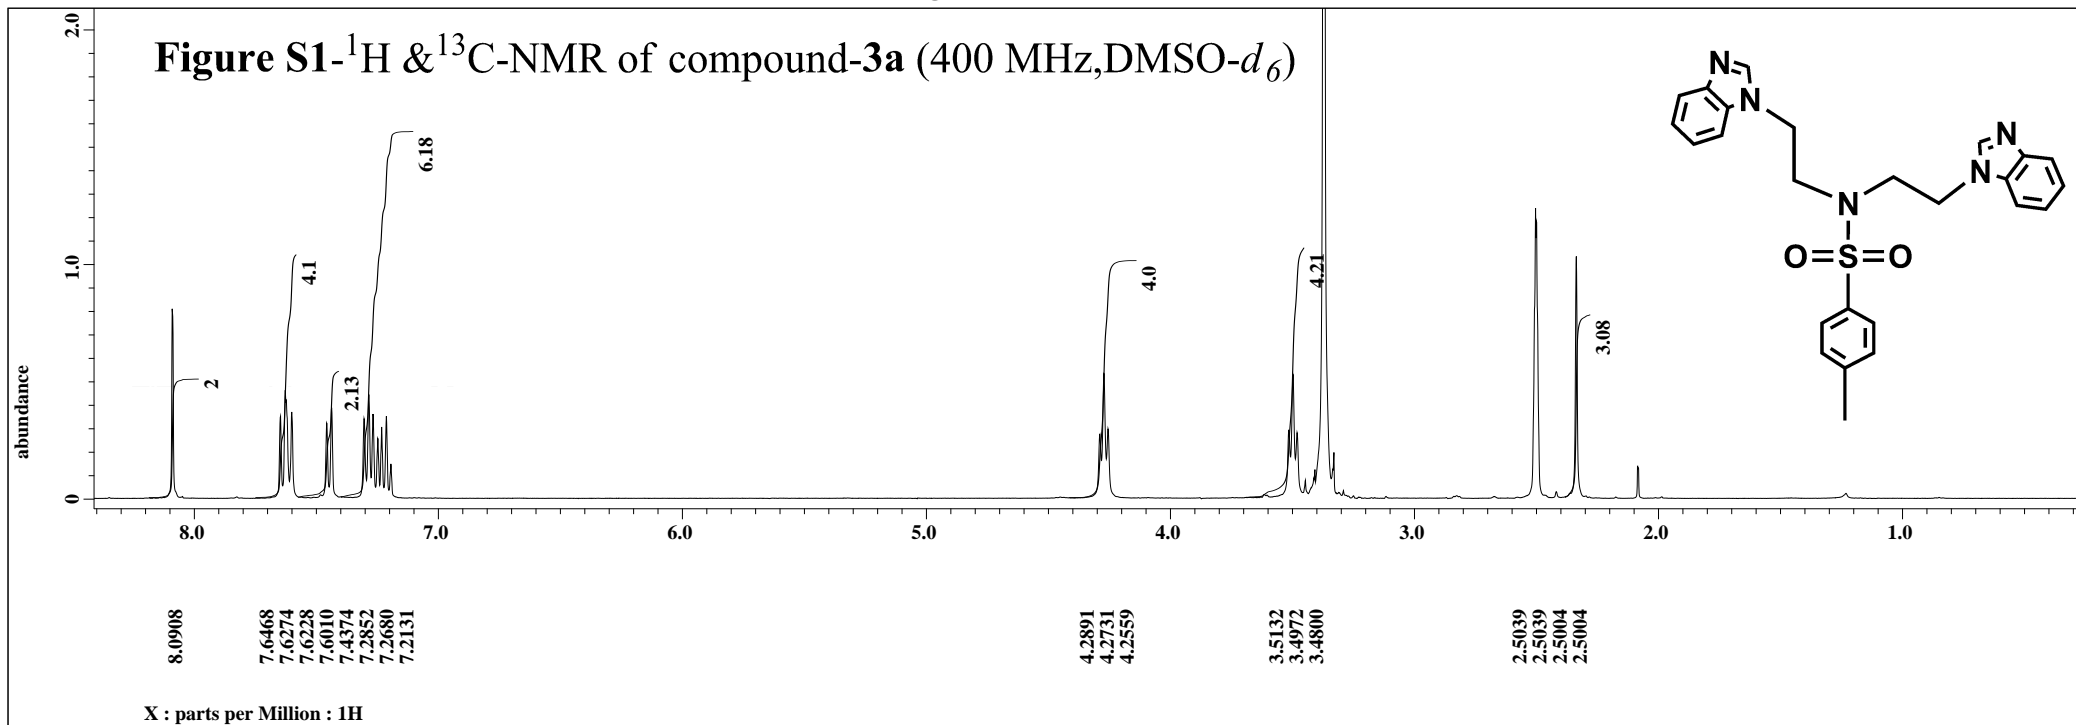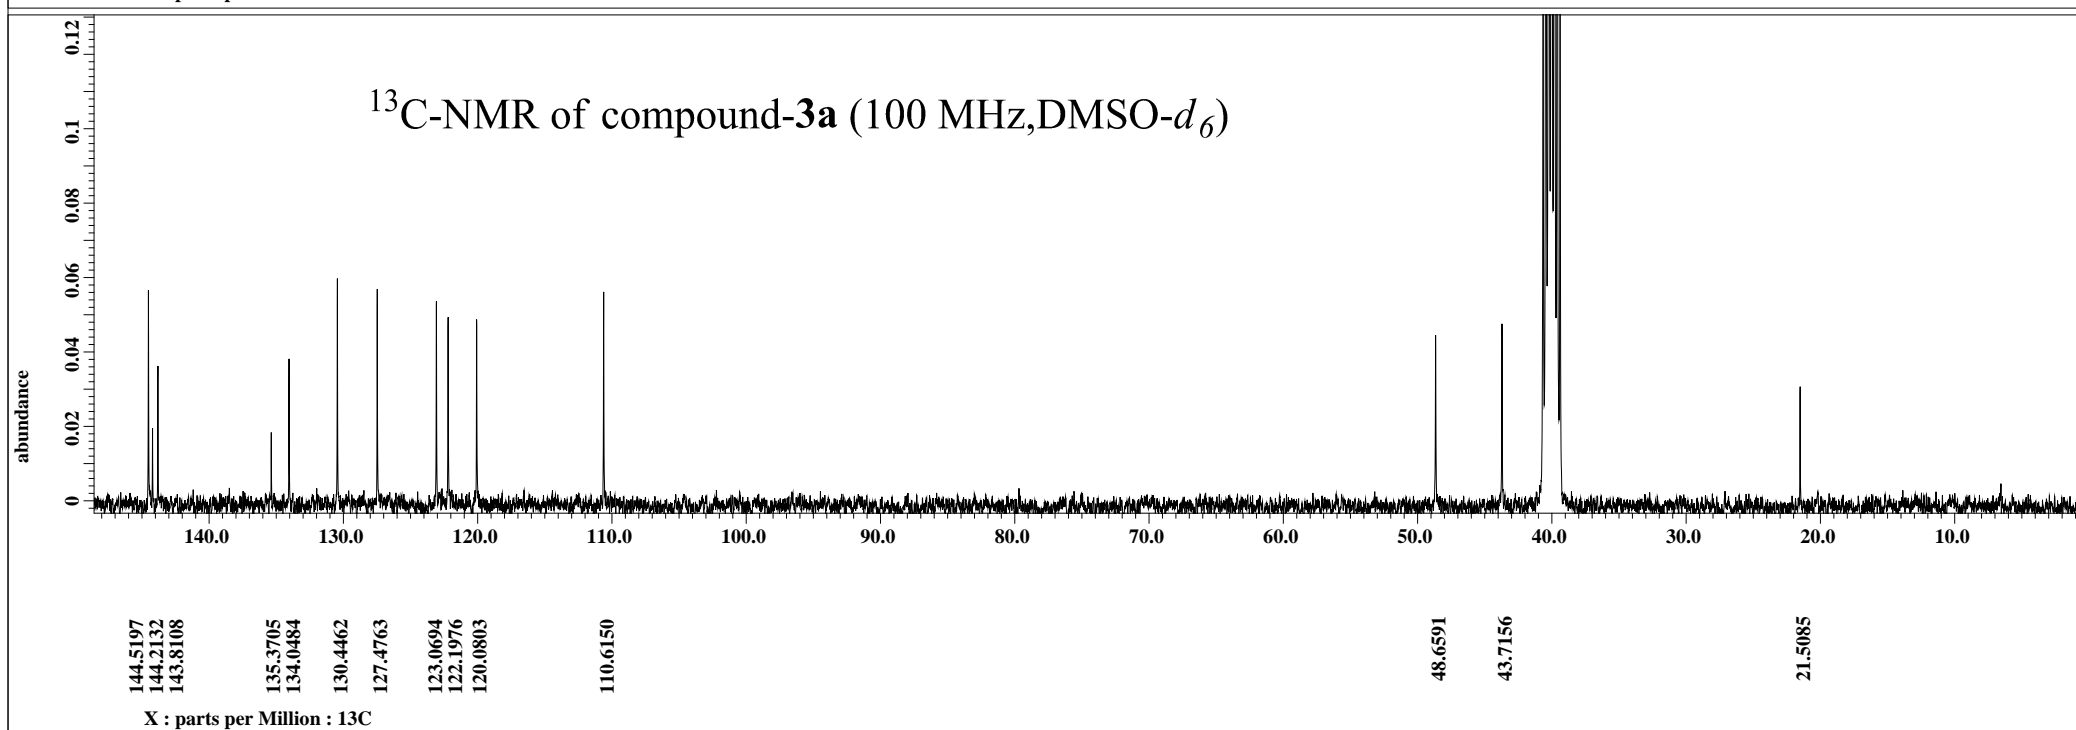

**Figure S2-**<sup>13</sup>C-NMR-Pendant of compound-**3a** (100 MHz,DMSO-*d*<sub>6</sub>)

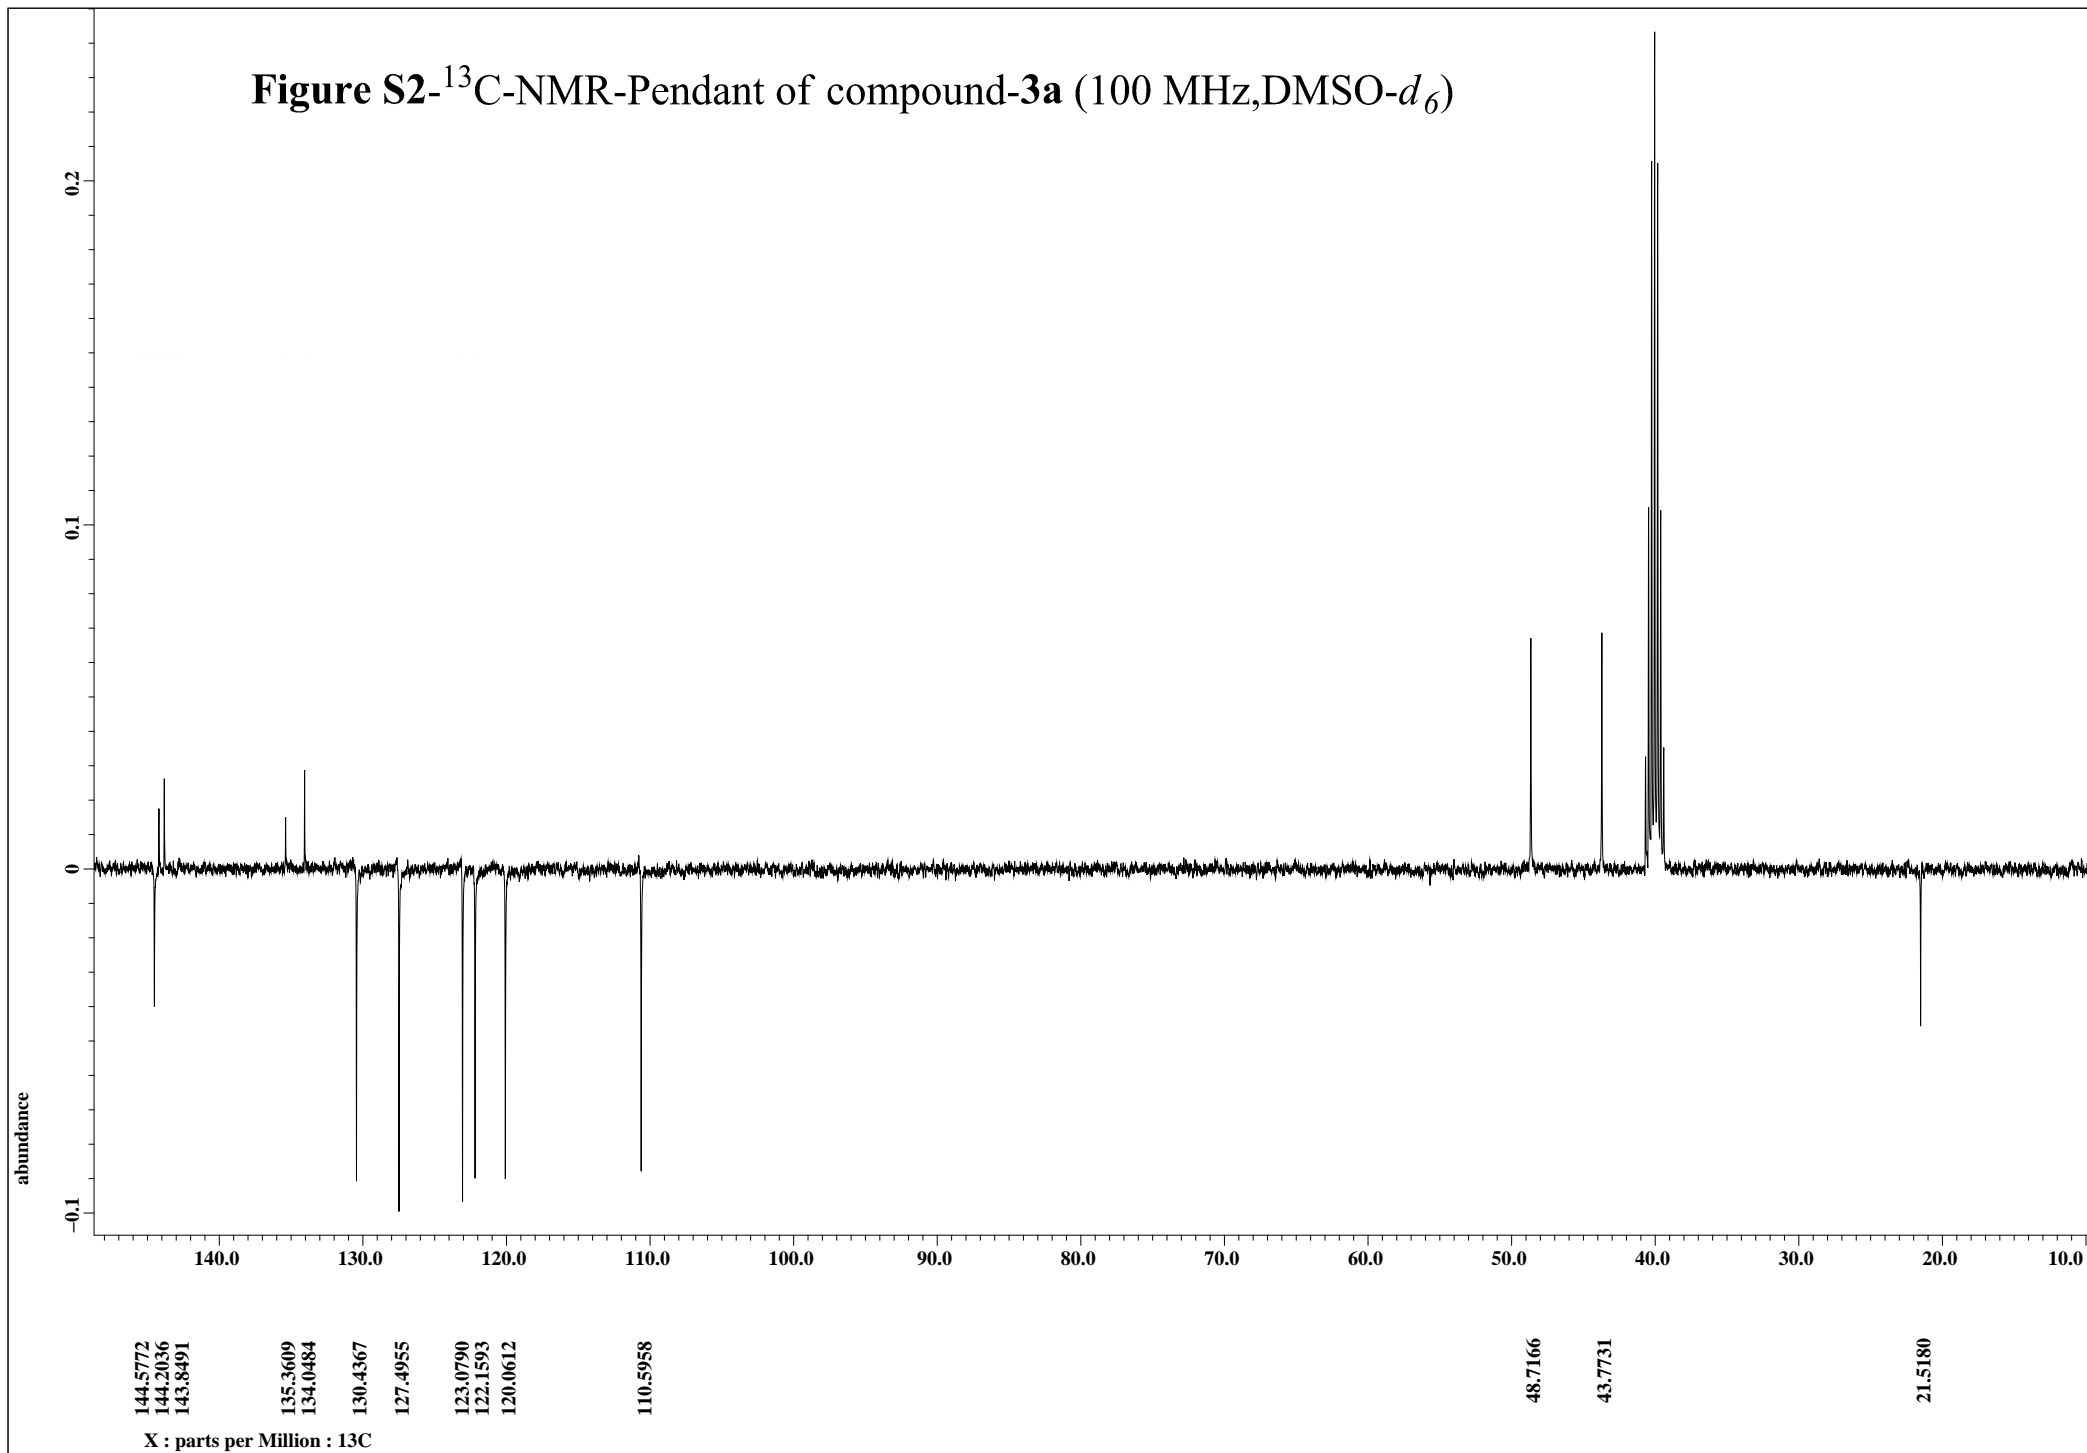

Figure S3-<sup>1</sup>H & <sup>13</sup>C-NMR of compound-3b (400 MHz, DMSO-*d*<sub>6</sub>)

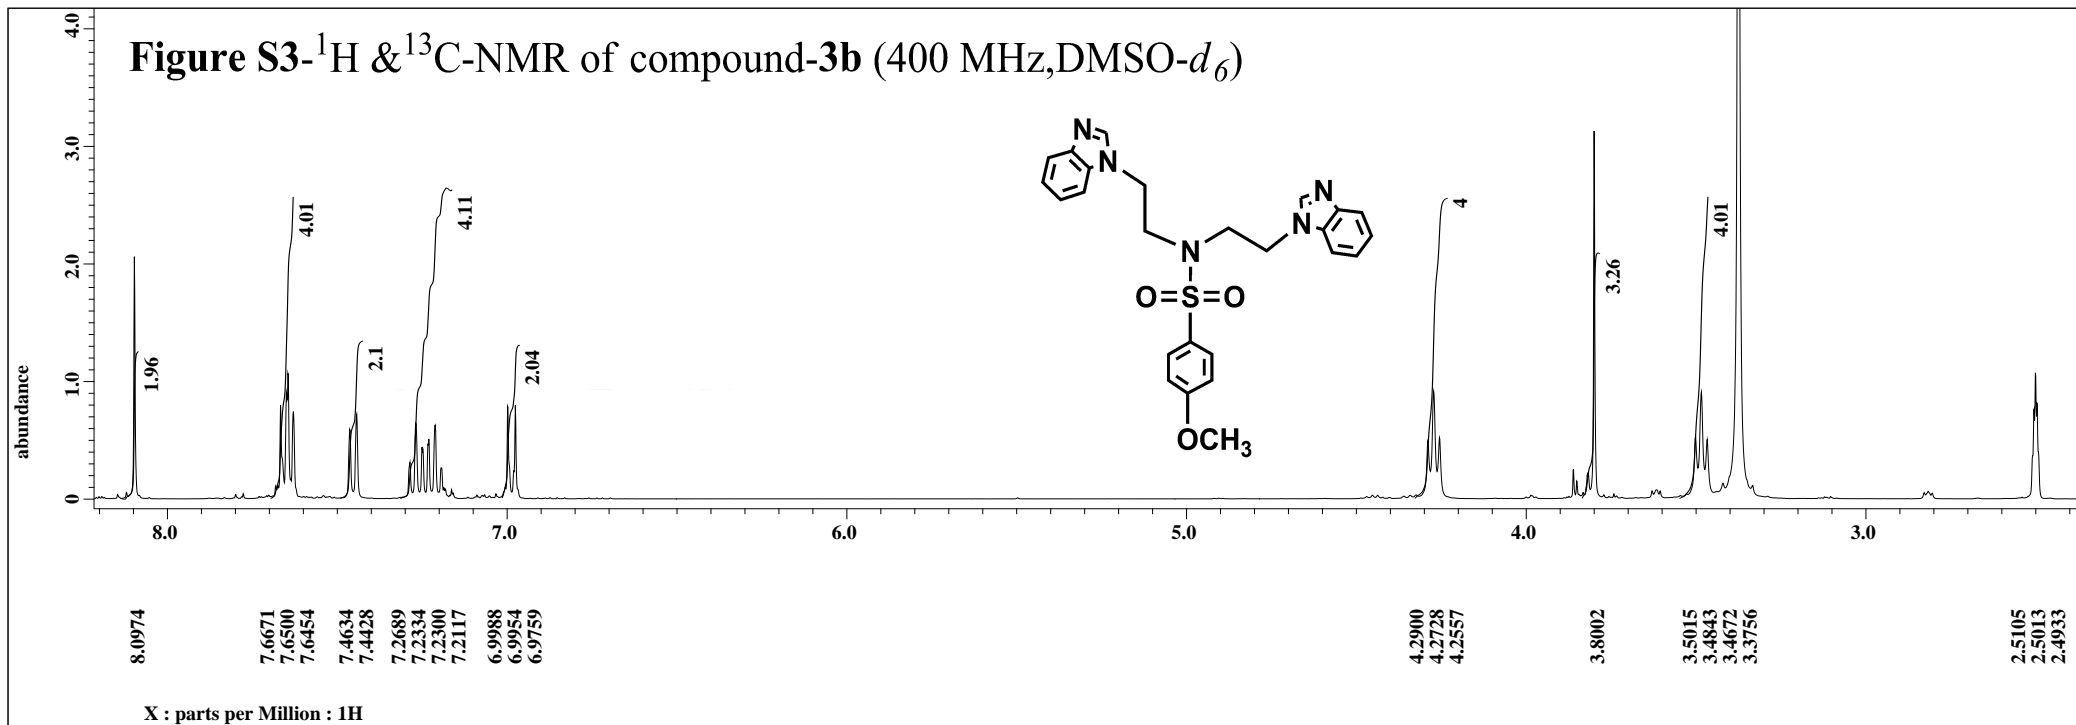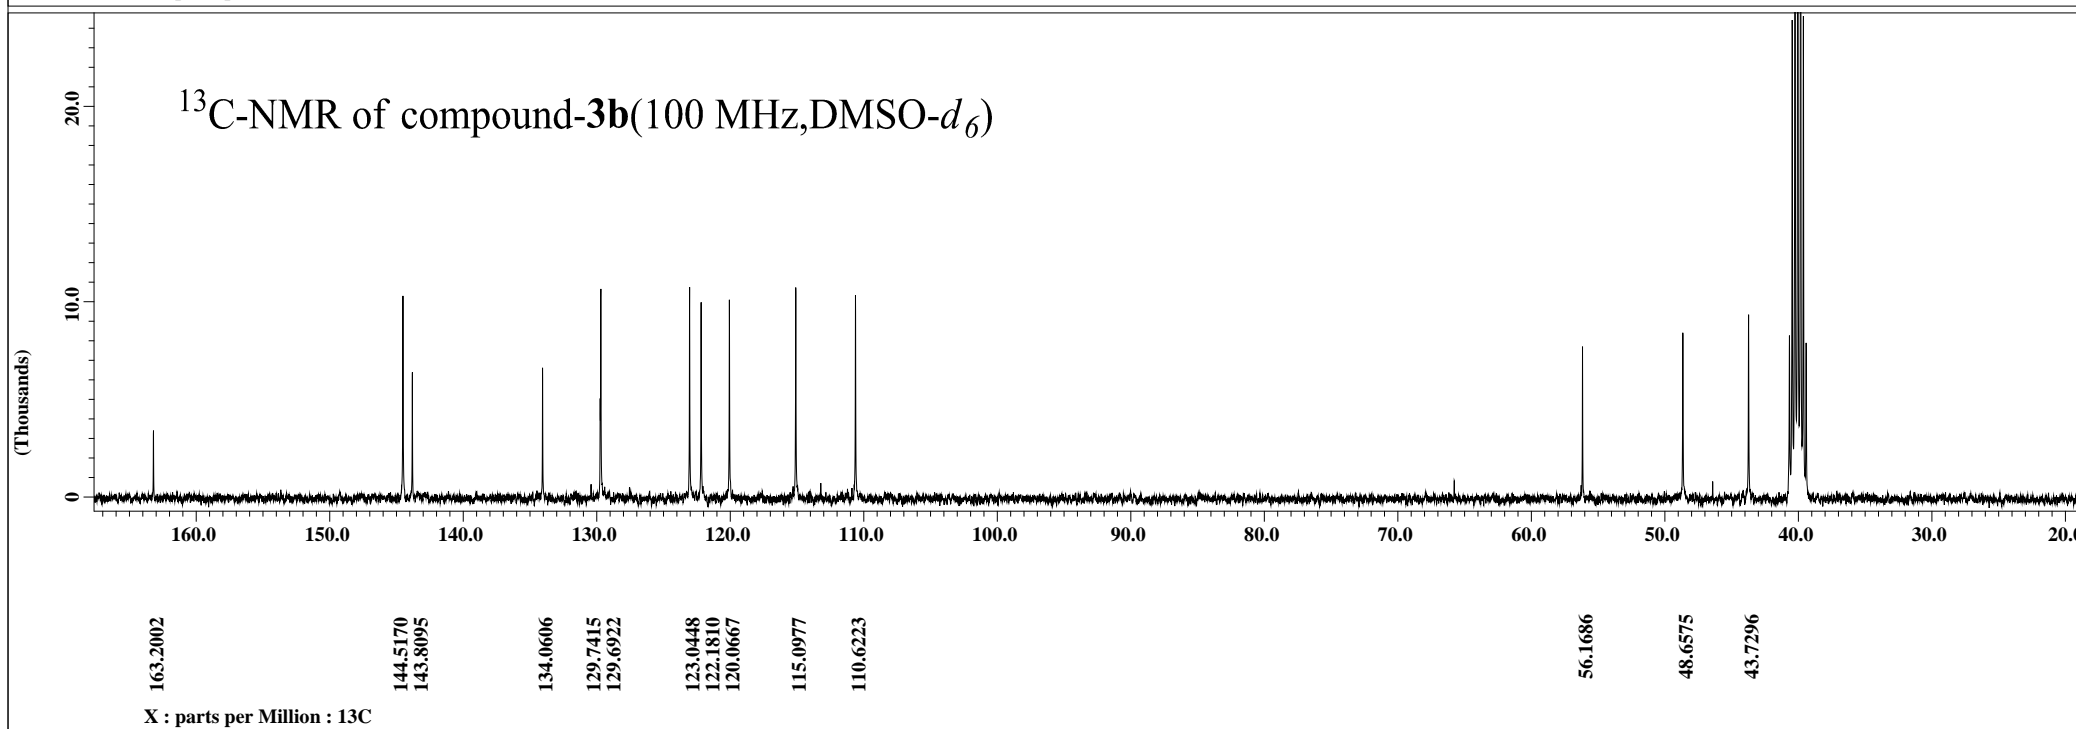

Figure S4-<sup>13</sup>C-NMR Pendant of compound-**3b** (100 MHz,DMSO-*d*<sub>6</sub>)

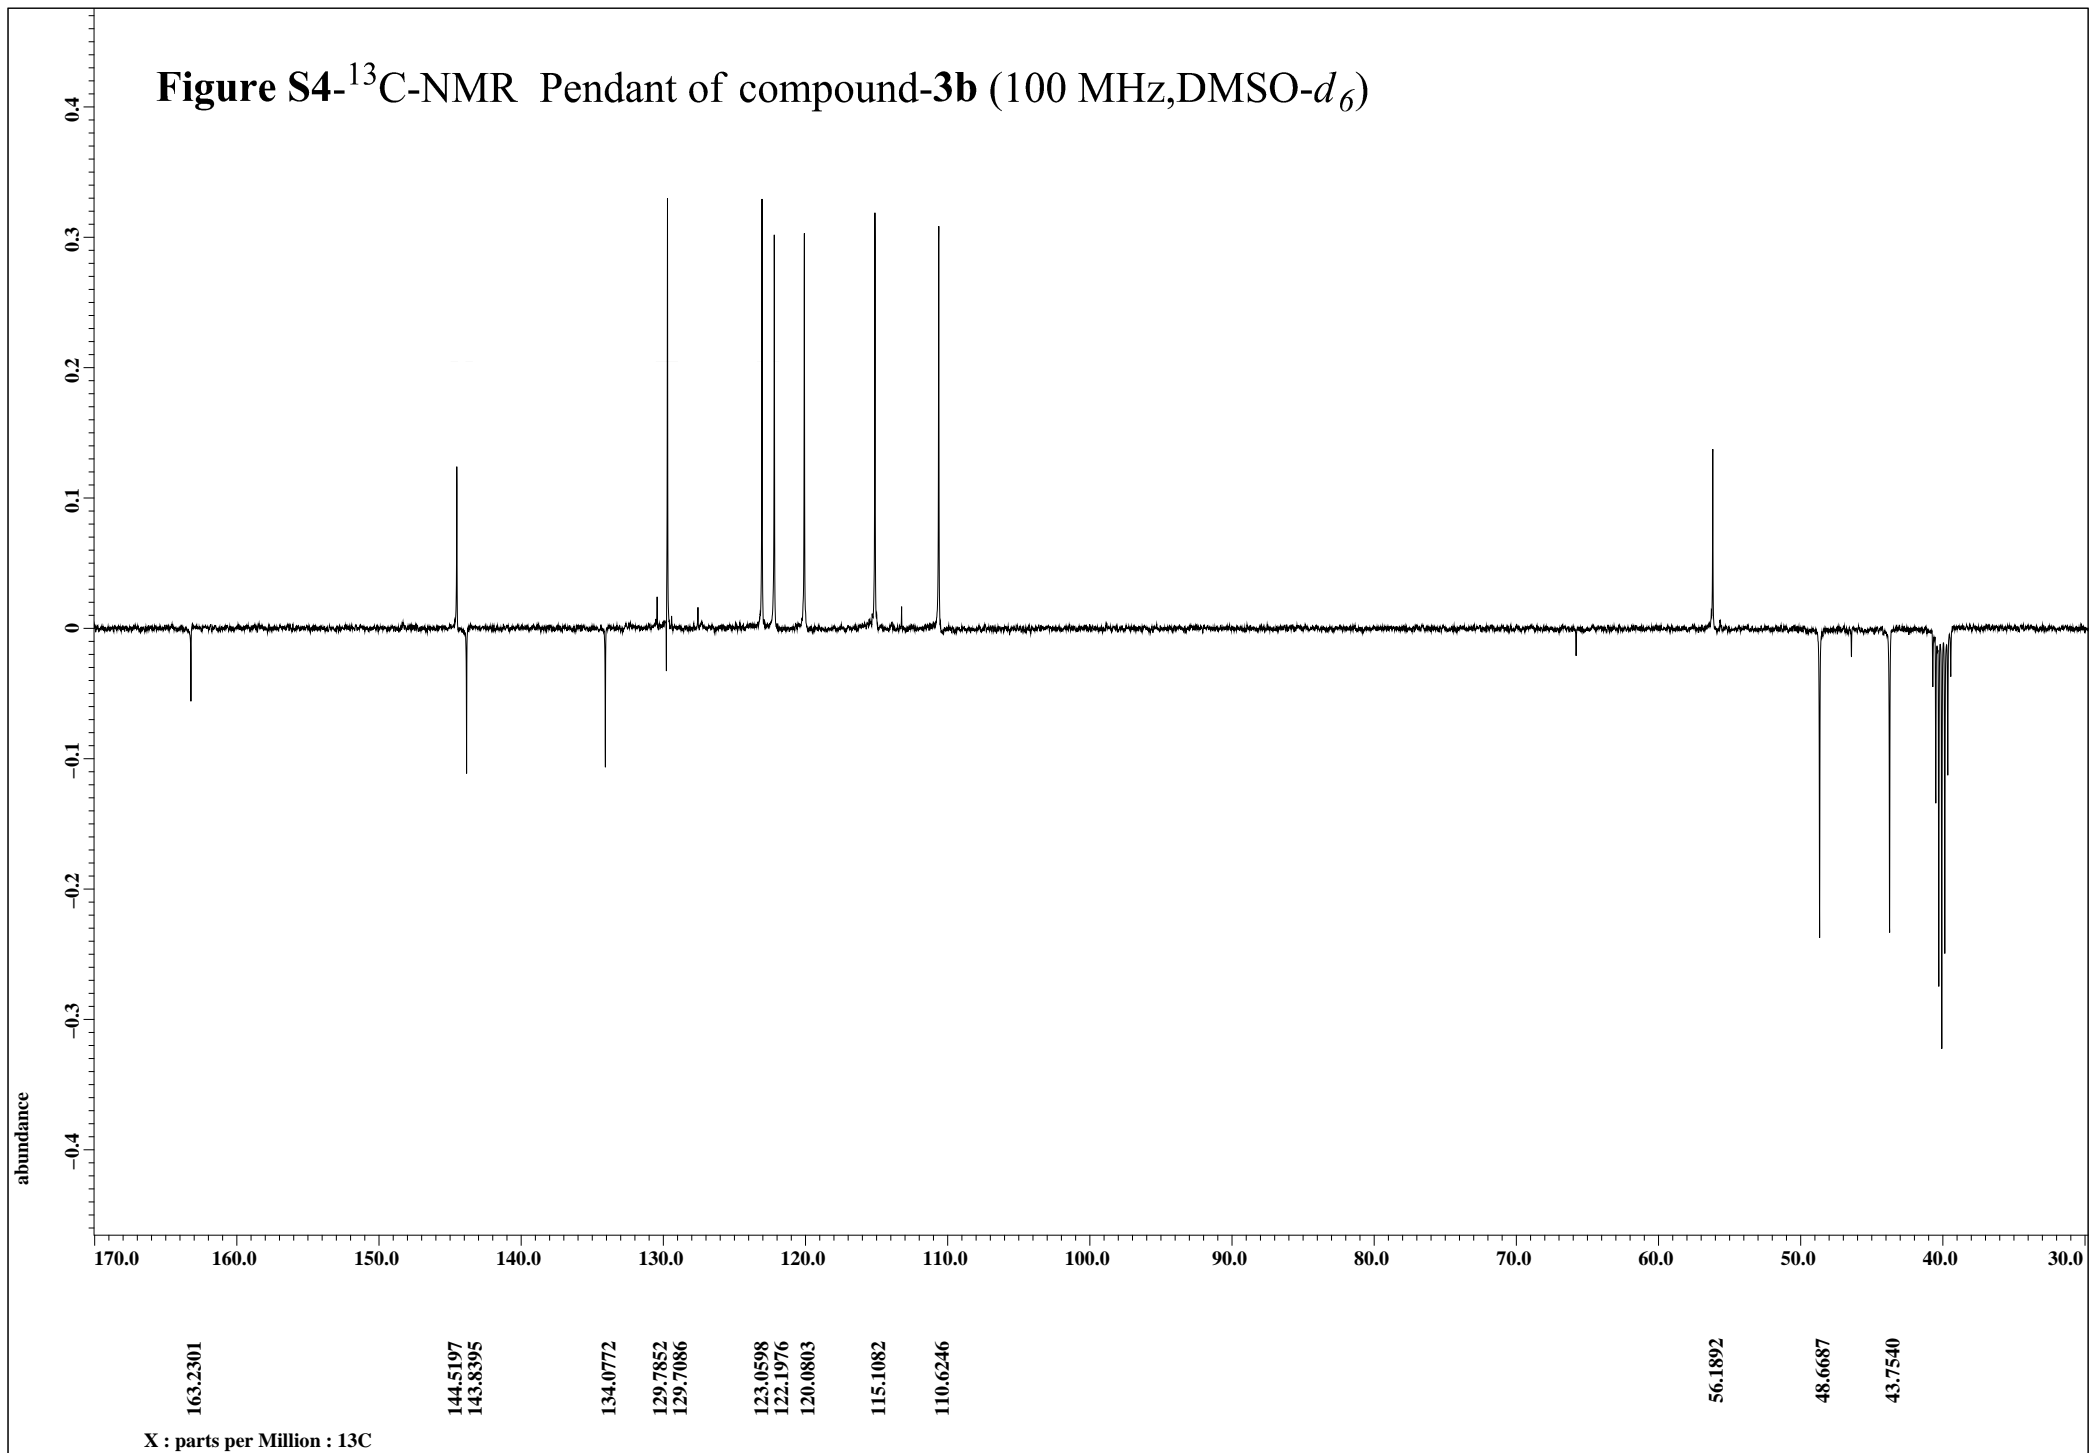

Figure S5-<sup>1</sup>H & <sup>13</sup>C-NMR of compound-4a (400 MHz, DMSO-*d*<sub>6</sub>)

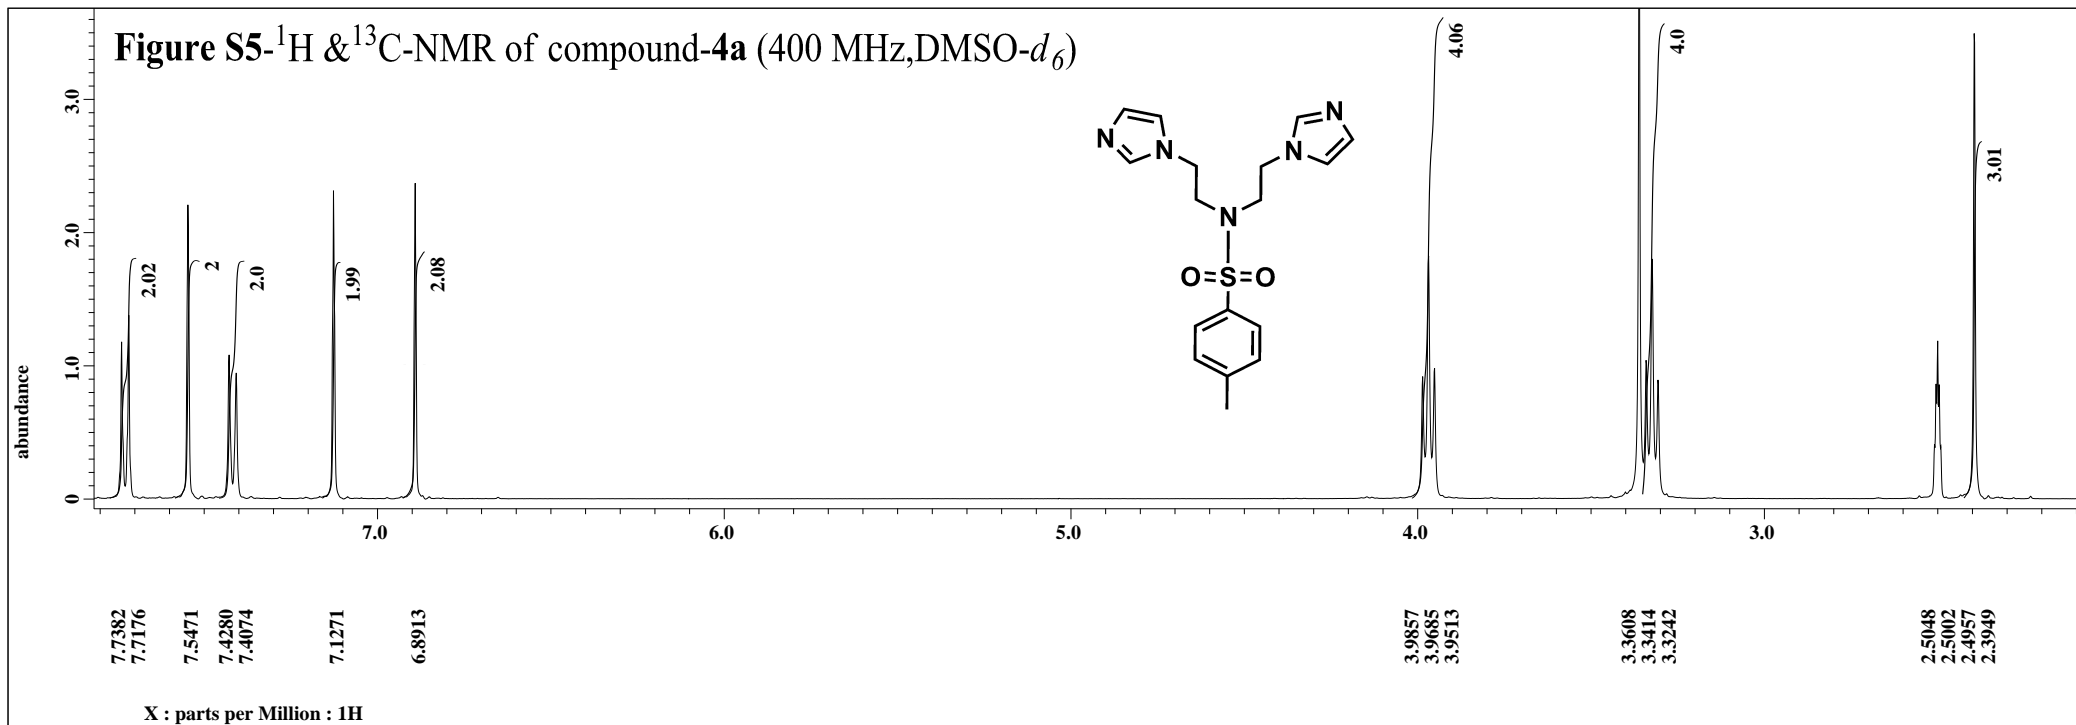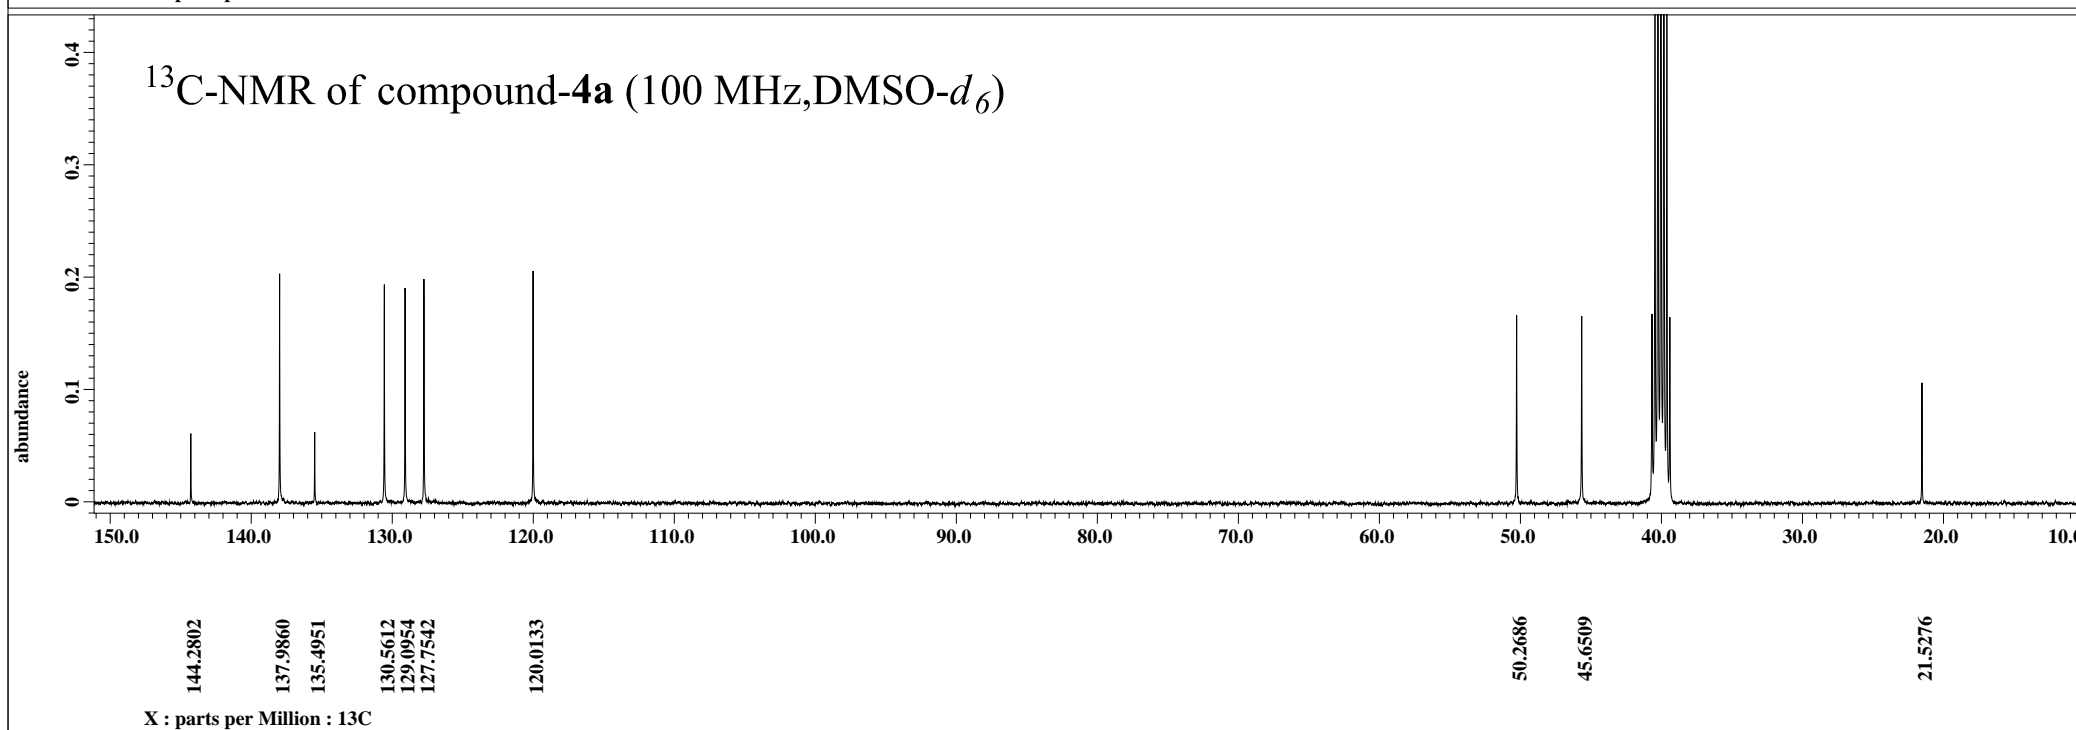

Figure S6-<sup>13</sup>C-NMR Pendant of compound-4a (100 MHz, DMSO-*d*<sub>6</sub>)

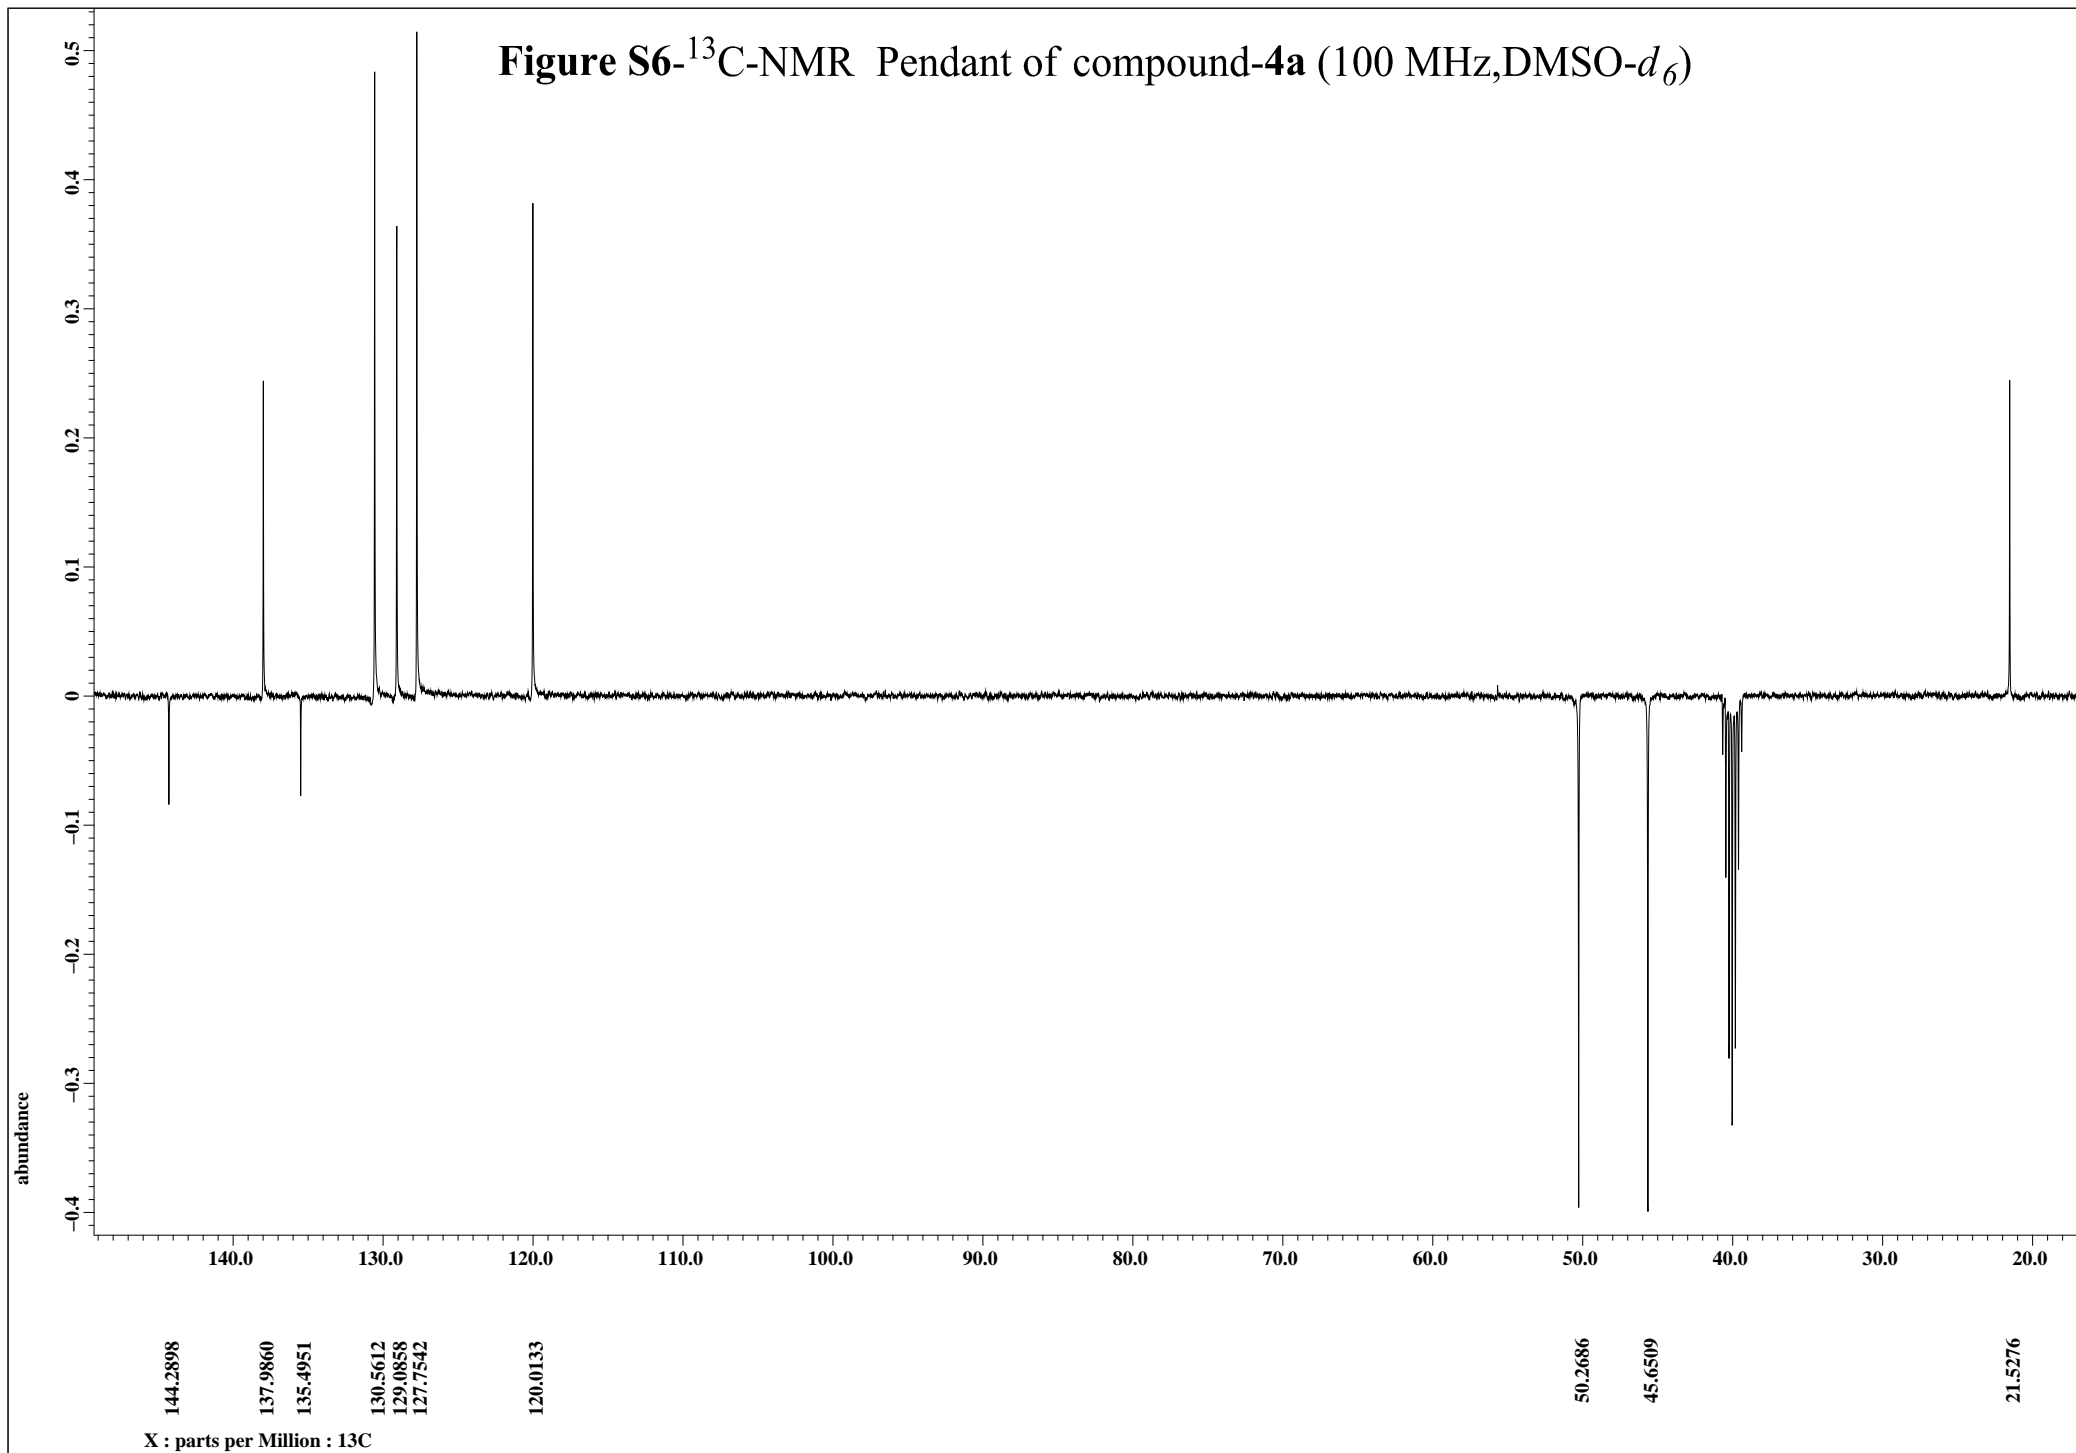

**Figure S7-<sup>1</sup>H & <sup>13</sup>C-NMR of compound-9 (400 MHz, CDCl<sub>3</sub>)**

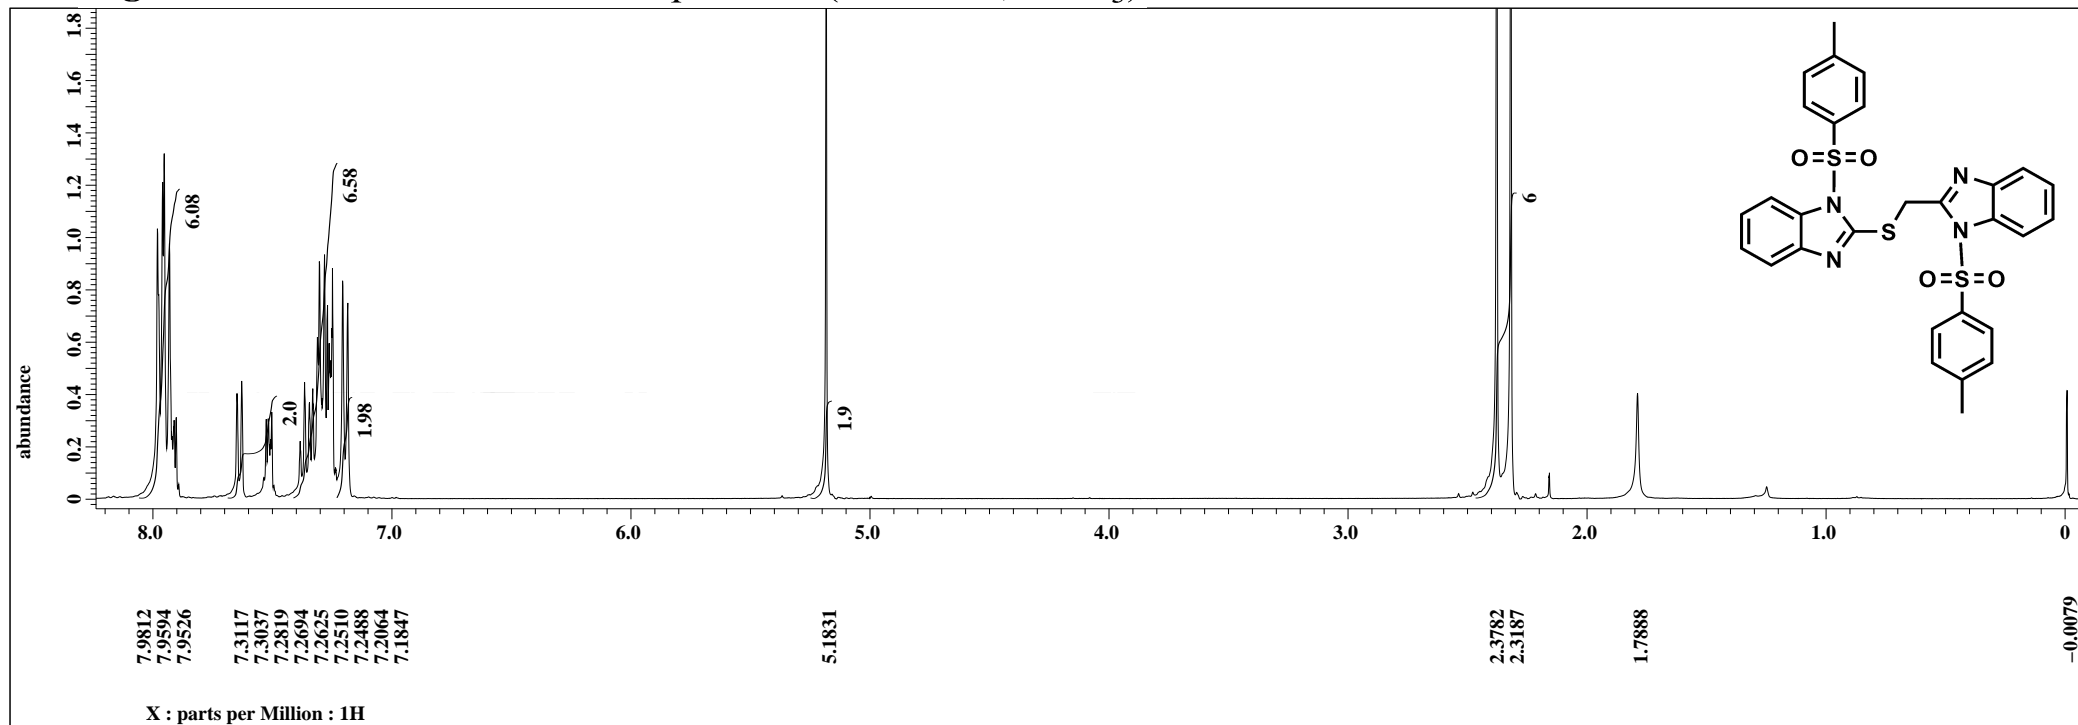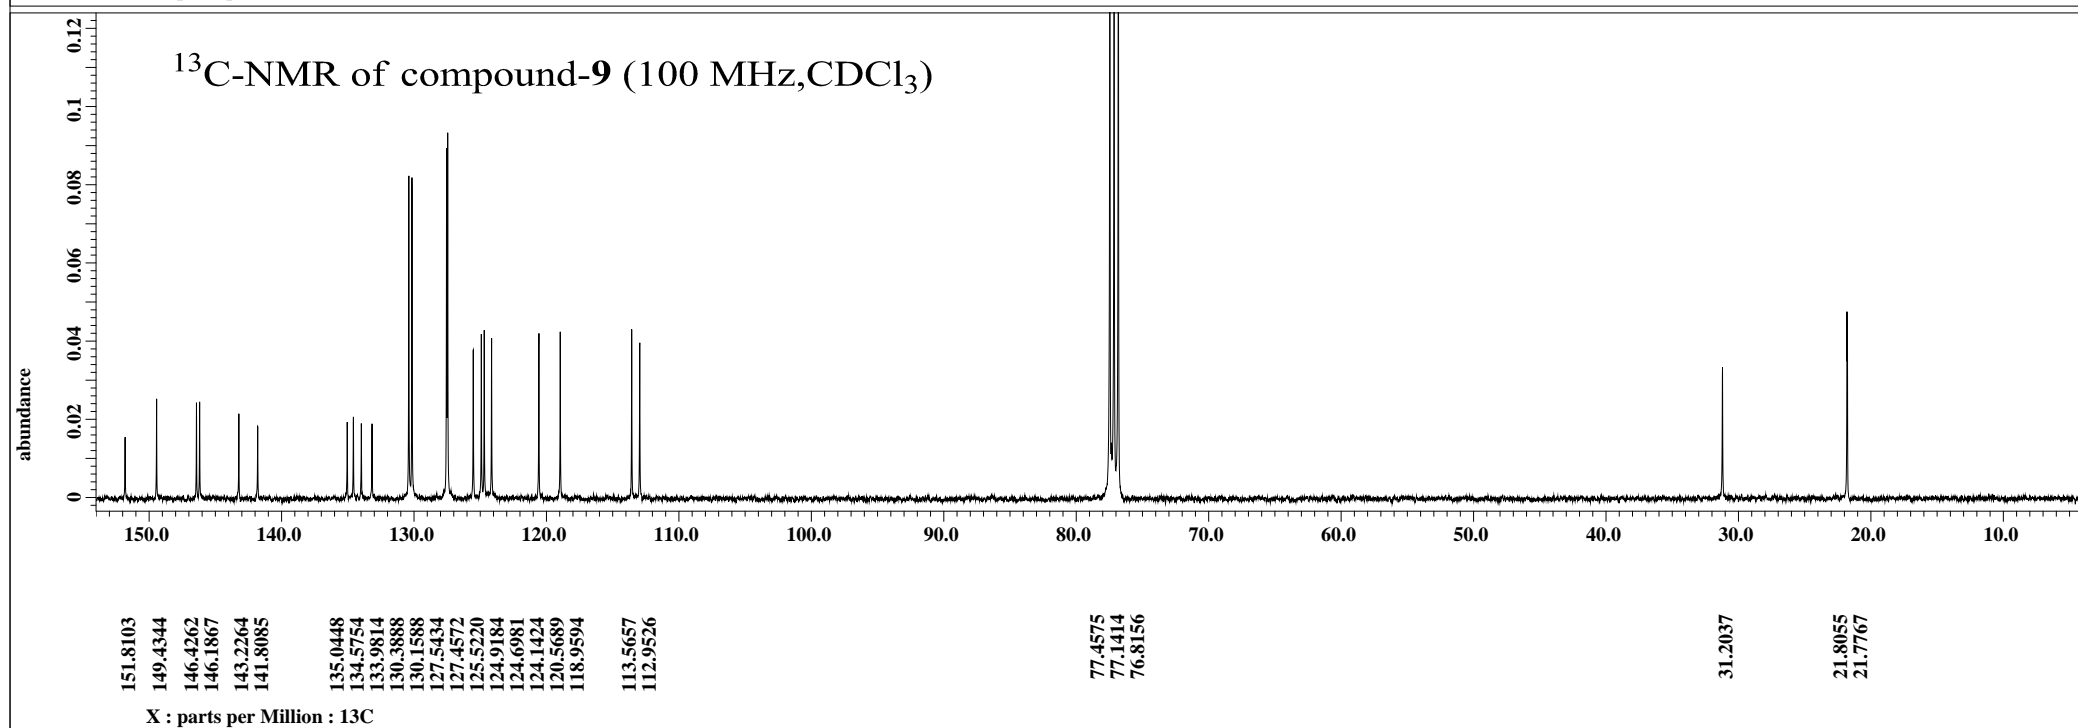

**Figure S8-**<sup>1</sup>H & <sup>13</sup>C-NMR of compound-11 (400 MHz, CDCl<sub>3</sub>)

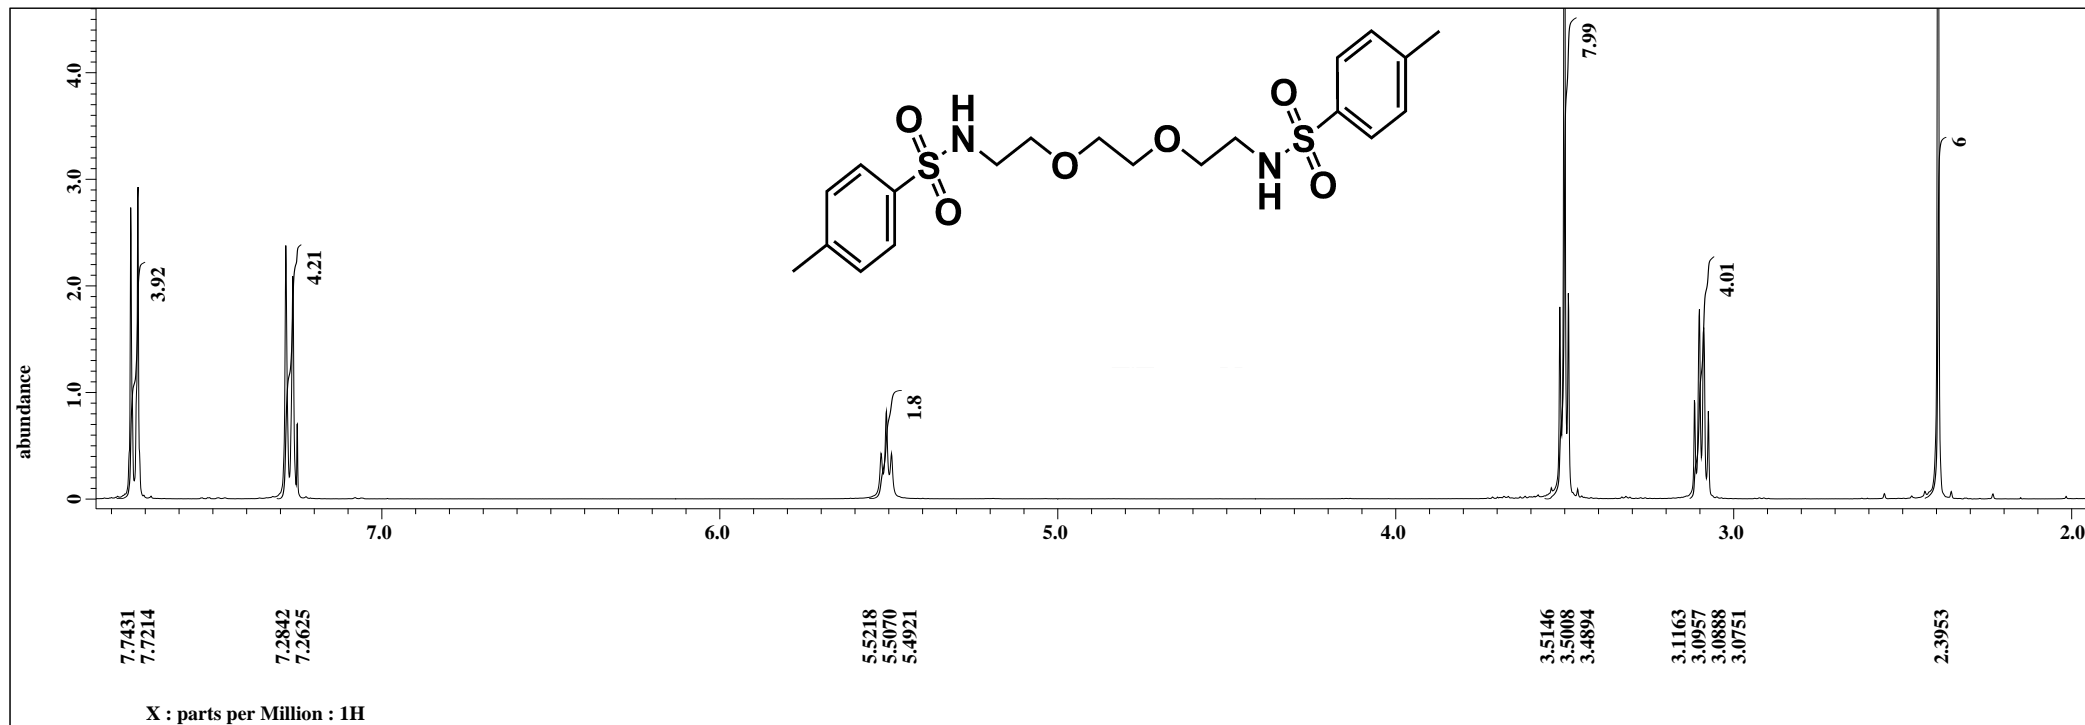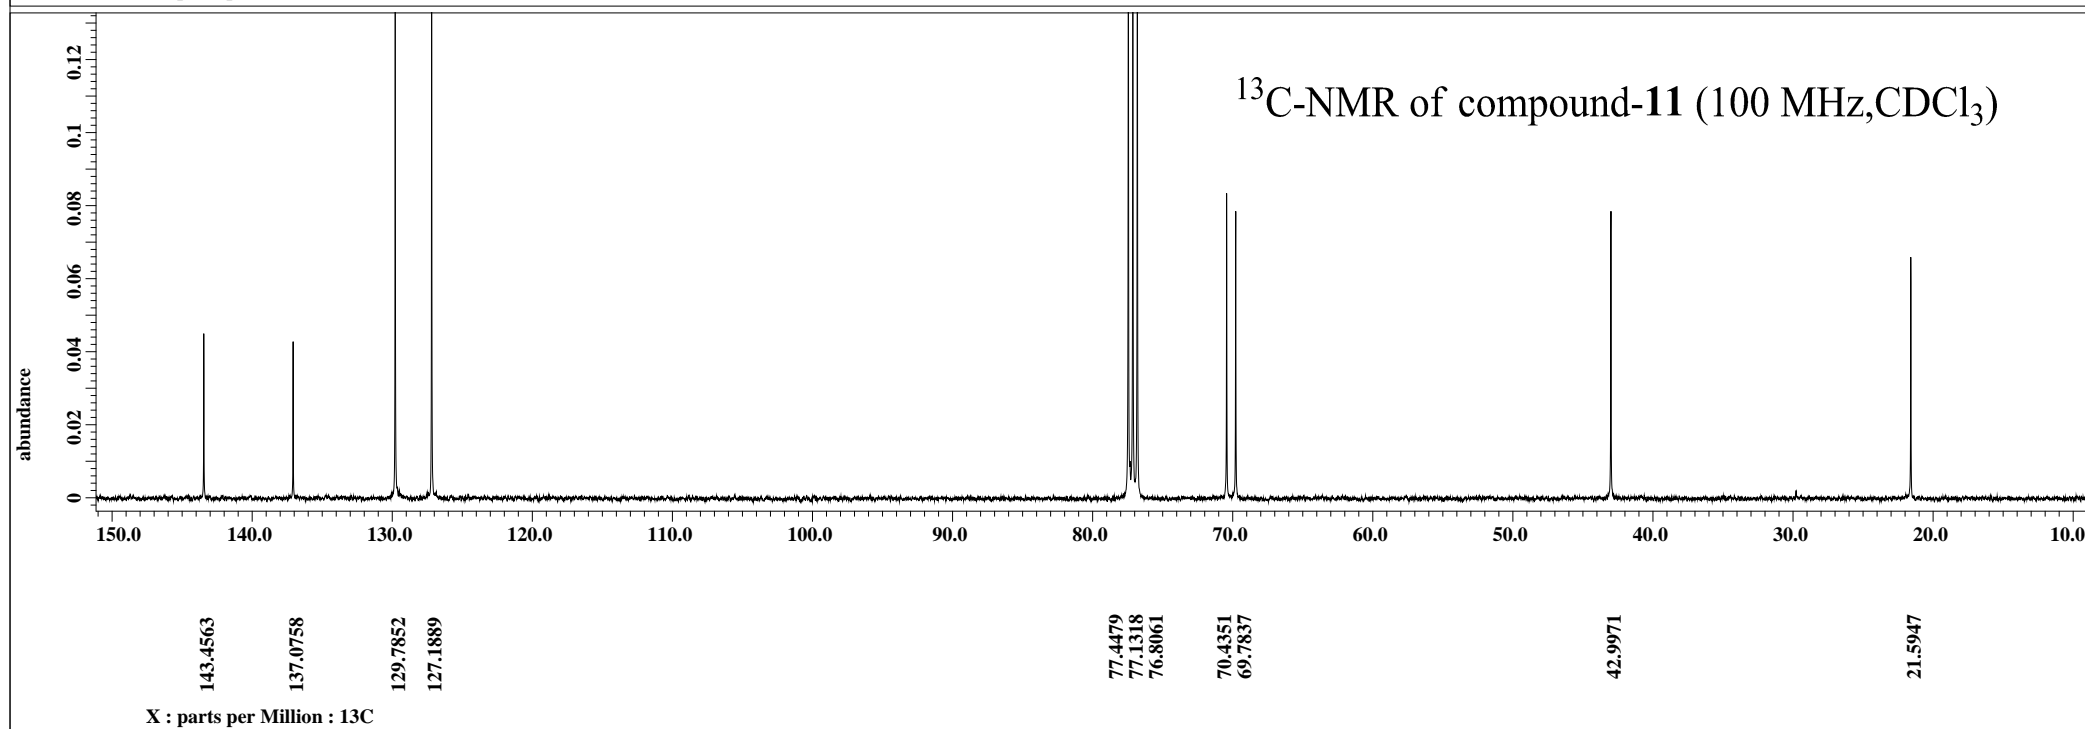



**Figure S9- HRMS of compound-3a**

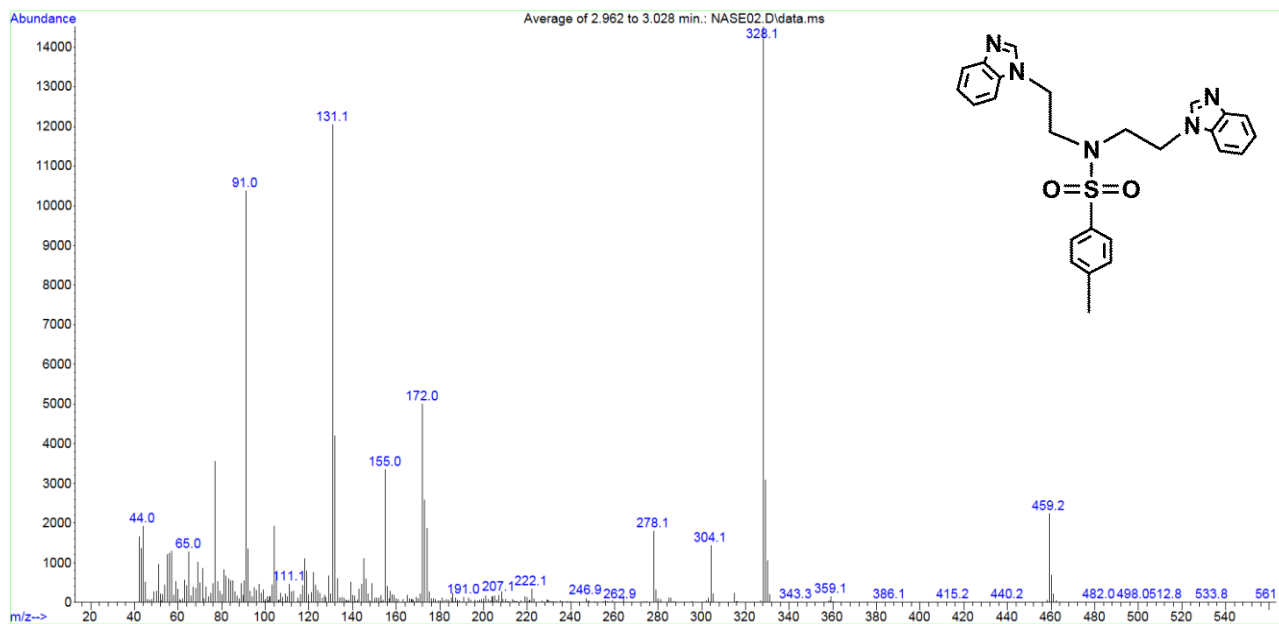

**Figure S10- HRMS of compound-4a**

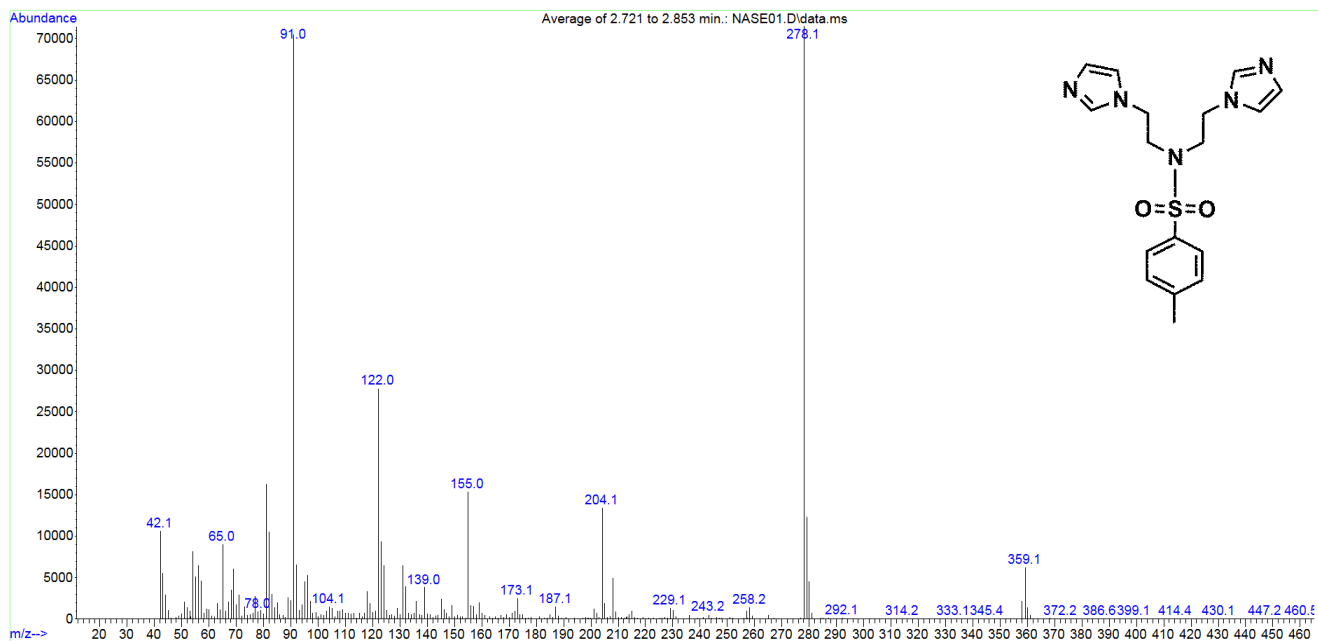

Supplement: molecules-18-11978-s001.pdf [file molecules-18-11978-s001.pdf]
